# Supplementary material for: Ion-Imprinted Polymeric Materials for Selective Adsorption of Heavy Metal Ions from Aqueous Solution
Source: MDPI journal article supplement (doi:10.3390/molecules28062798), 2023-03-20
Supplement: s1 [file s1]

## SUPPLEMENTARY MATERIAL

### Ion-imprinted polymeric materials for selective adsorption of heavy metal ions from aqueous solution

Maria Marinela Lazar <sup>1</sup>, Claudiu-Augustin Ghiorghita<sup>1</sup>, Ecaterina Stela Dragan<sup>1\*</sup>, Doina Humelnicu<sup>2</sup>, and Maria Valentina Dinu<sup>1,\*</sup>

<sup>1</sup> Department of Functional Polymers, "Petru Poni" Institute of Macromolecular Chemistry, Grigore Ghica Voda Alley 41 A, 700487 Iasi, Romani

<sup>2</sup> Faculty of Chemistry, Alexandru Ioan Cuza University of Iasi, Carol I Bd. 11, 700506 Iasi, Romania

\* Correspondence: sdragan@icmpp.ro (E.S.D.); vdinu@icmpp.ro (M.V.D)

#### Content:

**Table S1:** Sorption of Zn(II) ions by IIPs.

**Table S2.** Zn(II) Imprinted Polymeric Solid Phase Extractors.

**Table S3.** Selective extraction of Co(II) ions.

**Table S4.** Selective extraction of Fe(III).

**Table S5.** Fe(III) Imprinted Polymeric Solid Phase Extractors.

**Table S6.** Selective extraction of Hg(II).

**Table S7.** Selective extraction of Cr(III) and Cr(VI).

**Table S8.** Sorption of other transition metal ions by IIPs.

**Table S9.** Selective sorption of Ag(I), Au(III) and Pd(II) ions by IIP materials.

**Table S10.** Sorption of Ga(III), In(III) and Pb(II) ions by IIP materials.

The number of references is the same as in the main text.

**Table S1.** Sorption of Zn(II) ions by IIPs.

| Imprinted HMI | Polymeric material                                                                | $q_m$ , mg/g | Comments                                                                                                                                                                                                                                 | Ref. Sec. 3.5. |
|---------------|-----------------------------------------------------------------------------------|--------------|------------------------------------------------------------------------------------------------------------------------------------------------------------------------------------------------------------------------------------------|----------------|
| Zn(II)        | 1-VI-HEMA-EGDMA                                                                   | 5.29         | Batch adsorption<br>Conditions: pH 7.0; 298 K; 10 min<br>Fitted by Langmuir/PSO<br>Selectivity: $k'$ of ZnIIP was: 22.57, 5.44 and 46.17 for Zn(II)/Cu(II), Zn(II)/Ni(II) and Zn(II)/Co(II) ion pairs                                    | [84]           |
|               | Morin ligand<br>MAA-co-EGDMA                                                      | 45           | Batch adsorption<br>Conditions: pH 6.0; 1.2 g L <sup>-1</sup> ; 3 min<br>Fitted by Langmuir<br>Selectivity: $k'$ : 30.7, 23.9, 26.4, 42.6 and 26.8 with competitor ions Cu(II), Co(II), Ni(II), Pb(II) and Cd(II),                       | [85]           |
|               | 2,2'-bipyridyl ligand<br>4-VP-co-EGDMA                                            | 13.77        | Batch adsorption<br>Conditions: pH 6.2<br>Reusability: 10 % decrease of the original sorption capacity after 10 repeated cycles.<br>Selectivity coefficients for Zn(II)/Cu(II) and Zn(II)/Ni(II) were 8.52 and 52.                       | [90]           |
|               | Zincon ligand<br>GO/magnetic CS cross-linked with GA modified with AA<br>ST-EGDMA | 71.4         | Batch adsorption<br>Conditions: pH 8.5; 0.2 g L <sup>-1</sup> ; 298 K; 120 min<br>Fitted by Langmuir/PSO<br>Reusability: regenerated up to nine cycles without loss of sorption capacity<br>Determination of Zn(II) in various matrices. | [91]           |
|               | CS-MA cross-linked with EGDMA and TEOS                                            | 3.06         | Batch adsorption<br>Conditions: pH 7.0; 2 g L <sup>-1</sup> ; 298 K; 120 min<br>Fitted by Langmuir/PSO                                                                                                                                   | [92]           |
|               | CS/ATT/A-187                                                                      | 46.75        | Batch adsorption<br>Conditions: pH 6.0; 1 g L <sup>-1</sup> ; 298 K; 360 min<br>Fitted by Langmuir/PSO                                                                                                                                   | [93]           |

**Abbreviations:** AA - acrylic acid; ATT - attapulgit; A - 187-3-glycidoxypopyltrimethoxysilane; CS - chitosan; EGDMA - ethyleneglycol dimethacrylate; GO - graphene oxide; GA - glutaraldehyde; HEMA - 2-hydroxyethyl methacrylate; MAA - methacrylic acid; MA - methacrylamide; ST - styrene; TEOS - tetraethylortosilicate; 1-VI - 1-vinylimidazole; 4-VP - 4-vinylpyridine.

**Table S2.** Zn(II) Imprinted Polymeric Solid Phase Extractors.

| Complexing Reagent  | Zn(II) Imprinted Polymeric Solid Phase Extractors                                                                                                                                                                                                                                                                                                                                                                                                                                                                                                                                                                                                                                                                                                                                                                                                                             | Refs. |
|---------------------|-------------------------------------------------------------------------------------------------------------------------------------------------------------------------------------------------------------------------------------------------------------------------------------------------------------------------------------------------------------------------------------------------------------------------------------------------------------------------------------------------------------------------------------------------------------------------------------------------------------------------------------------------------------------------------------------------------------------------------------------------------------------------------------------------------------------------------------------------------------------------------|-------|
| Salicylic acrylate  | 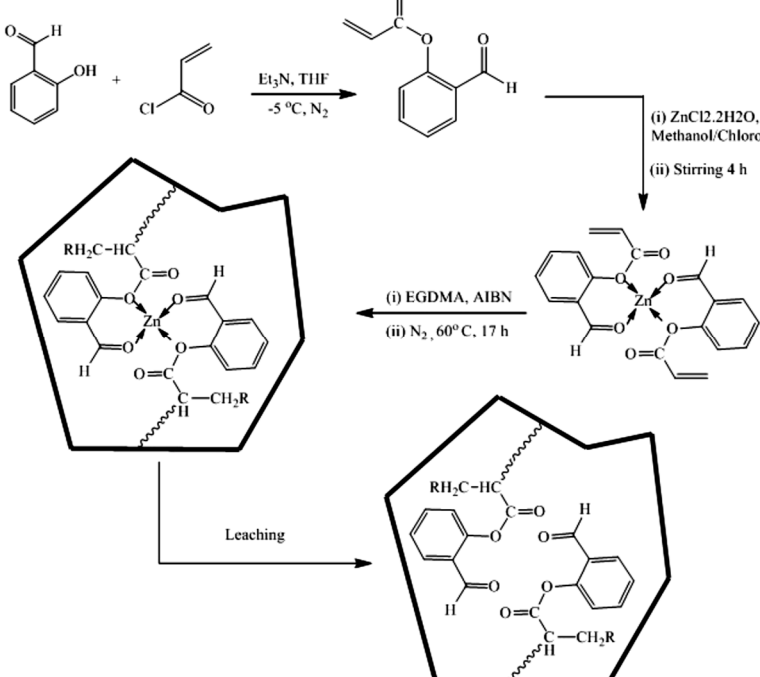 <p>The reaction scheme illustrates the synthesis of Zn(II) imprinted polymeric solid phase extractors using salicylic acrylate. It begins with the reaction of salicylaldehyde and acryloyl chloride in the presence of <math>\text{Et}_3\text{N}</math> and THF at <math>-5^\circ\text{C}</math> under <math>\text{N}_2</math> to form salicylic acrylate. This intermediate then reacts with <math>\text{ZnCl}_2 \cdot 2\text{H}_2\text{O}</math> in a methanol/chloroform mixture, followed by stirring for 4 hours. The resulting complex is copolymerized with EGDMA and AIBN under <math>\text{N}_2</math> at <math>60^\circ\text{C}</math> for 17 hours. The final polymer structure is shown with a leaching step to remove the Zn(II) template, leaving an imprinted cavity.</p> | [87]  |
| 2,2'-Bipyridyl/4-VP |  <p>The reaction scheme illustrates the synthesis of Zn(II) imprinted polymeric solid phase extractors using 2,2'-bipyridyl and 4-vinylpyridine (4-VP). It begins with the self-assembly of a Zn(II) complex with 2,2'-bipyridyl and 4-VP. This complex is then polymerized with EGDMA. The final polymer structure is shown with a template removal step to leave an imprinted cavity.</p>                                                                                                                                                                                                                                                                                                                                                                                               | [90]  |

|                                                                                 |                                                                                                                                                                                                                                                                                                    |             |
|---------------------------------------------------------------------------------|----------------------------------------------------------------------------------------------------------------------------------------------------------------------------------------------------------------------------------------------------------------------------------------------------|-------------|
| <p>Zn(II) complexed with zincon-IIP grafted on GO/magnetic CS nanocomposite</p> | <p>Complex formation<br/>pH = 8.5</p> <p>GO-Chm (1g) + EGDMA (32mmol) + AIBN (50 mg) + Styrene (8mmol) → polymerization (24 h, 60°C) → Unleached magnetic polymer</p> <p>Unleached magnetic polymer + EDTA (0.005 mol L<sup>-1</sup>, pH = 5.5) → Leaching → Leached magnetic polymer (purple)</p> | <p>[91]</p> |
|---------------------------------------------------------------------------------|----------------------------------------------------------------------------------------------------------------------------------------------------------------------------------------------------------------------------------------------------------------------------------------------------|-------------|

**Table S3.** Selective extraction of Co(II) ions.

| Template ions | Polymeric material                                                                     | pH | Contact time, min | $q_m$ , mg/g | Interfering ions                               | $k$                                   | Remarks on adsorption process                                        | Ref. |
|---------------|----------------------------------------------------------------------------------------|----|-------------------|--------------|------------------------------------------------|---------------------------------------|----------------------------------------------------------------------|------|
| Co(II)        | P(MAA)/DPA composites                                                                  |    | 20                | 15.39        | Ni(II)<br>Fe(III)<br>Mg(II)                    | 18.46<br>13.77<br>30.11               | Batch adsorption;<br>Reusability: 7 cycles                           | [95] |
| Co(II)        | P(4-VP)/DPA composites                                                                 |    | 30                | 14.04        | Ni(II)<br>Fe(III)<br>Mg(II)                    | 9.39<br>38.53<br>10.41                | Batch adsorption;<br>Reusability: 7 cycles                           | [95] |
| Co(II)        | Fe <sub>3</sub> O <sub>4</sub> /SiO <sub>2</sub> /P(1-VI) composites                   | 7  | 180               | 23.09        | Cu(II)<br>Cd(II)<br>Zn(II)<br>Pb(II)           | 19.99<br>50.28<br>11.02<br>7.56       | Batch adsorption;<br>Fitting: Langmuir/PSO;<br>Reusability: 4 cycles | [96] |
| Co(II)        | P(AAPTS)/Fe <sub>3</sub> O <sub>4</sub> @TiO <sub>2</sub> /SiO <sub>2</sub> composites | 8  | 30                | 35.21        | Pb(II)<br>Ni(II)<br>Cd(II)                     | 41.17<br>79.74<br>56.48               | Batch adsorption;<br>Fitting: Langmuir;<br>Reusability: 7 cycles     | [97] |
| Co(II)        | P(B2MP-co-GG)/Fe <sub>3</sub> O <sub>4</sub> composites                                | 8  | 20                | 33.4         | Fe(II)<br>Cu(II)<br>Mg(II)<br>Zn(II)<br>Ni(II) | 5.25<br>4.05<br>6.06<br>11.81<br>4.48 | Batch adsorption;<br>Fitting: Langmuir/PSO;<br>Reusability: 6 cycles | [98] |

|        |                                                                  |   |      |             |                                       |                                     |                                                                                  |       |
|--------|------------------------------------------------------------------|---|------|-------------|---------------------------------------|-------------------------------------|----------------------------------------------------------------------------------|-------|
|        |                                                                  |   |      |             |                                       |                                     |                                                                                  |       |
| Co(II) | 8-HQ/ $\gamma$ -Fe <sub>2</sub> O <sub>3</sub> -CS biocomposites | 8 | 10   | 100         | Cd(II)<br>Ni(II)<br>Pb(II)            | 11<br>42<br>2                       | Batch adsorption;<br>Fitting: Langmuir/PSO;<br>Reusability: 3 cycles             | [99]  |
| Co(II) | CS/zeolite composite cryo-beads                                  | 4 | 1440 | 120.4–126.6 | Cu(II)<br>Ni(II)<br>Cd(II)<br>Fe(III) | 9.543<br>6.660<br>20.320<br>225.391 | Batch adsorption;<br>Fitting: Sips and Double Langmuir;<br>Reusability: 5 cycles | [100] |
| Co(II) | CS/zeolite composite cryo-beads                                  | 6 | 1440 | 86.2–102.3  | Cu(II)<br>Ni(II)<br>Cd(II)<br>Fe(III) | 1.589<br>1.087<br>2.025<br>14.692   | Batch adsorption;<br>Fitting: Sips and Double Langmuir;<br>Reusability: 5 cycles | [100] |

Abbreviations: PMMA – *N*-(pyrrolidin-2-ylmethyl) methacrylamide; AAPTS – 3-(2-aminoethylamino) propyltrimethoxysilane; B2MP – bis(2-methacryloxyethyl) phosphate; GG – glycylglycine; 8 - HQ-8-hydroxyquinoline; DPA – dipicolinic acid.

**Table S4.** Selective extraction of Fe(III).

| Template ions | Polymeric material                                                           | pH  | Contact time, min | $q_m$ , mg/g | Interfering ions                                                                         | $k$ | $k'$                                                               | Remarks on adsorption process                                                                               | Ref.  |
|---------------|------------------------------------------------------------------------------|-----|-------------------|--------------|------------------------------------------------------------------------------------------|-----|--------------------------------------------------------------------|-------------------------------------------------------------------------------------------------------------|-------|
| Fe(III)       | HEMA+EGDMA +MAC- Fe <sup>3+</sup><br>(HEMAC-Fe <sup>3+</sup> )<br>(monolith) | 5.0 |                   | 0.92         | Fe(II)<br>Cd(II)<br>Ni(II)                                                               |     | 24.8<br>37<br>59.7                                                 | Column adsorption;<br>flow rate 0.5 mL min <sup>-1</sup><br>Fitted by Langmuir                              | [114] |
| Fe(III)       | MAAP-Fe <sup>3+</sup> -<br>NIPAAm                                            | 4.0 | 30                | 14.23        | Ni(II)<br>Co(II)<br>Mn(II)<br>Zn(II)<br>Al(III)<br>Cu(II)                                |     | 83.4<br>66.4<br>62.5<br>41.2<br>16.3<br>14.8                       | Batch adsorption<br>Fitted by Langmuir                                                                      | [115] |
| Fe(III)       | (DHBPT)2-Fe(III)<br>+MAA+EGDMA                                               | 4.5 | 15                | 40.41        | Mn(II)<br>Cd(II)<br>Cu(II)<br>Pb(II)<br>Zn(II)<br>Ni(II)<br>Al(III)<br>Cr(III)<br>Fe(II) |     | 2.98<br>2.36<br>1.61<br>1.64<br>1.71<br>2.66<br>2.4<br>3.5<br>2.49 | Batch adsorption<br>Reusability: sorption capacity loss of 3% at the end of the 6 sorption/desorption cycle | [116] |
| Fe(III)       | 2,2'-bipyridyl-Fe(II) complex                                                | 7.0 | 30                | 1.58         | Mn(II)<br>Pb(II)                                                                         |     | 19.5<br>67.5                                                       | Batch adsorption<br>Fitted by Langmuir                                                                      | [119] |

|         |                                    |     |     |        |                                                                     |                                     |                                                             |                                                                                                                                          |       |
|---------|------------------------------------|-----|-----|--------|---------------------------------------------------------------------|-------------------------------------|-------------------------------------------------------------|------------------------------------------------------------------------------------------------------------------------------------------|-------|
|         | 4-VP-TMPTMA                        |     |     |        |                                                                     |                                     |                                                             |                                                                                                                                          |       |
| Fe(III) | AA-Fe(III)<br>+<br>EGDMA           | 3.5 |     | 114.25 | Cr(III)                                                             | 492.18                              | 50.87                                                       | Batch adsorption<br>Fitted by<br>Langmuir/PSO                                                                                            | [120] |
| Fe(III) | BMAOP-Fe(III)<br>+<br>EGDMA        | 2.0 | 180 | 15.71  | Cr(III)<br>Co(II) Ni(II)<br>Cu(II)<br>Zn(II)                        | 701<br>6926<br>1302<br>1171<br>2726 | 2.44<br>4.38<br>4.17<br>1.78<br>4.15                        | Batch adsorption<br>Fitted by<br>Freundlich/PSO<br>Reusability: no<br>obvious decrease of<br>the sorption capacity<br>after six cycles.  | [121] |
| Fe(III) | Fe(III)-P(HEMA-<br>MAGA)<br>+EGDMA | 4.0 | 60  | 204.8  | Cd(II)<br>Co(II)<br>Cr(III)<br>Ni(II)<br>Pb(II)<br>Zn(II)<br>Mn(II) |                                     | 196.5<br>241.2<br>218.3<br>191.5<br>164.7<br>147.2<br>252.8 | Batch adsorption                                                                                                                         | [123] |
| Fe(III) | Fe(III)-P(HEMA-<br>MAGA)<br>+EGDMA | 2.5 | 60  | 83.33  | Zn(II)<br>Cr(III)<br>Al(III)                                        |                                     | 8.85<br>4.91<br>6.29                                        | Batch adsorption<br>Fitted by<br>Langmuir/PSO<br>Reusability:<br>preservation of<br>removal capacity up<br>to 97.13% after ten<br>cycles | [124] |

**Abbreviations:** BMAOP – bis(2-methacryloxyethyl)phosphate; DHBPT - 3,6-bis (3,5-dimethyl-1-H-pyrazol-1-yl)-1,2-dihydro-1,2,4,5-tetrazine); MAAP - methacryloylaminoantipyrine; MAC - N-methacryloyl-(L)-cysteine methyl ester; MAGA - N-methacryloyl-(L)-glutamic acid; MMA - methyl methacrylate; NIPAAm - N-isopropyl acrylamide; TMPTMA - trimethylolpropane trimethacrylate.

**Table S5.** Fe(III) Imprinted Polymeric Solid Phase Extractors.

| Complexing Reagent      | Fe(III) Imprinted Polymeric Solid Phase Extractors                                                                                                                                         | Refs. |
|-------------------------|--------------------------------------------------------------------------------------------------------------------------------------------------------------------------------------------|-------|
| Methacryloyl antipyrine | 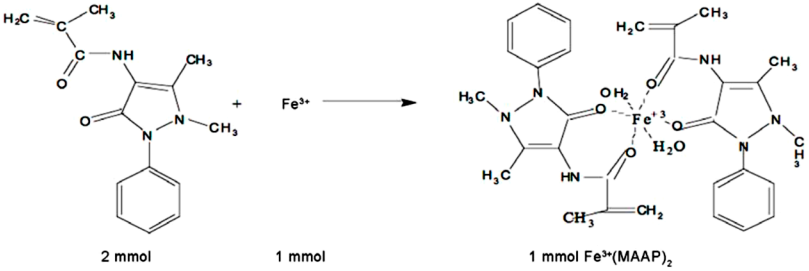 <p>2 mmol                      1 mmol                      1 mmol Fe<sup>3+</sup>(MAAP)<sub>2</sub></p> | [115] |
| 2,2'-bipyridyl          |  <p>Fe(II) removing<br/>Fe(II) rebinding</p> <p>polymerization</p>                                      | [119] |
| AA                      |  <p>EGDMA<br/>AIBN</p> <p>HCl</p>                                                                      | [120] |

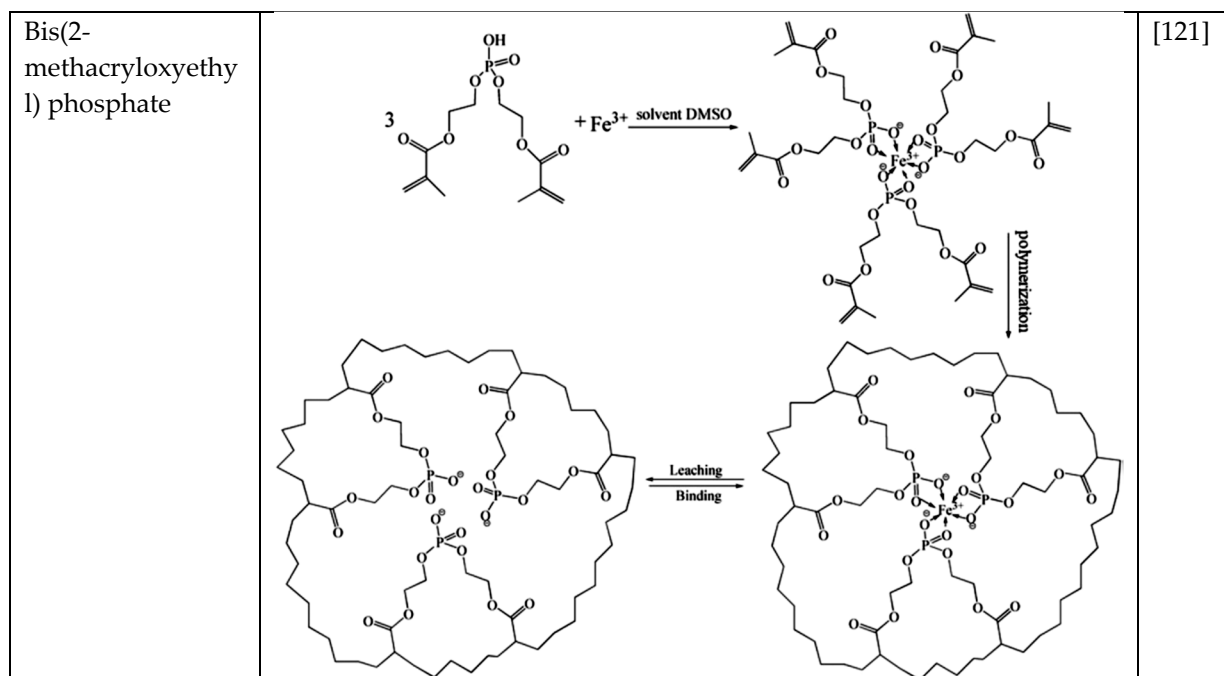

**Table S6.** Selective extraction of Hg(II).

| Template ions | Polymeric material                                                    | pH  | Contact time, min | $q_m$ , mg/g | Interfering ions                                                                             | $k$                                                       | $k'$ | Remarks on adsorption process                                                                                                        | Ref.  |
|---------------|-----------------------------------------------------------------------|-----|-------------------|--------------|----------------------------------------------------------------------------------------------|-----------------------------------------------------------|------|--------------------------------------------------------------------------------------------------------------------------------------|-------|
| Hg(II)        | Ligand-1-(2-thiazolylazo)-2-naphtol<br>MAA-TMPTMA microbeads          | 7.0 | 15                | 6.42         | Cu(II)<br>Ni(II)<br>Co(II)<br>Pb(II)<br>Cd(II)<br>Zn(II)<br>CH <sub>3</sub> Hg(I)            | 113.9<br>233.3<br>376.9<br>73.1<br>132.4<br>445.5<br>1633 |      | Batch sorption;                                                                                                                      | [125] |
| Hg(II)        | Ligand-1-pyrrolidinedithiocarboxylic acid<br>MAA-TMPTMA nanoparticles | 7.0 | 30                | 12.84        | Cd(II)<br>Cu(II)<br>Fe(III)<br>Mn(II)<br>Ni(II)<br>Pb(II)<br>Zn(II)<br>CH <sub>3</sub> Hg(I) | 143<br>450<br>400<br>695<br>776<br>330<br>860<br>1100     |      | Batch sorption;<br>Fitted by<br>Langmuir/PSO<br>Reusability: 5%<br>lower sorption<br>capacity after 100<br>cycles                    | [127] |
| Hg(II)        | Dithizone/Hg(II) complex<br>APTES-TEOSI                               | 7.0 | 80                | 4.45         | Zn(II)<br>Cd(II)<br>Pb(II)<br>MeHg(I)<br>EtHg(I)                                             | 33.54<br>26.63<br>22.09<br>19.06<br>21.56                 |      | Batch sorption;<br>Fitted by<br>Langmuir/PSO<br>Reusability: 5% loss<br>of the sorption<br>capacity after ten<br>sorption/desorption | [128] |



|         |                                      |     |    |       |                                                |  |                                          |                                                                                                                                                          |       |
|---------|--------------------------------------|-----|----|-------|------------------------------------------------|--|------------------------------------------|----------------------------------------------------------------------------------------------------------------------------------------------------------|-------|
|         |                                      |     |    |       |                                                |  |                                          | cycles                                                                                                                                                   |       |
| Hg(II)  | PB-CS                                | 5.0 | 80 | 315   | Pb(II)<br>Co(II)<br>Zn(II)<br>Cu(II)<br>Cd(II) |  | 17.87<br>14.4<br>12.45<br>15.37<br>16.07 | Batch sorption;<br>Fitted by<br>Langmuir/PSO<br>Reusability: > 95%<br>of the initial<br>sorption capacity<br>after five<br>sorption/desorption<br>cycles | [132] |
| MeHg(I) | MBT-MeHg(I) complex<br>+<br>AA-EGDMA | 8.0 |    | 0.457 | Hg(II)<br>Cd(II)<br>Pb(II)<br>Zn(II)           |  | 0.86<br>260<br>288<br>1510               | Batch sorption;<br>Fitted by<br>Freundlich/PSO                                                                                                           | [136] |

**Abbreviations:** APTES - 3-aminopropyltriethoxysilane; MBT - 2-mercaptobenzothiazole; PB - ligand Schiff base prepared from 4-amino-3-hydroxybenzoic acid and 2-pyridinecarboxaldehyde; RT - room temperature; TEOSI - triethoxysilane.

**Table S7.** Selective extraction of Cr(III) and Cr(VI).

| Imprinted HMI | Polymeric material                                                                                                                            | $q_m$ , mg/g | Comments                                                                                                                                                                                                                                             | Ref.  |
|---------------|-----------------------------------------------------------------------------------------------------------------------------------------------|--------------|------------------------------------------------------------------------------------------------------------------------------------------------------------------------------------------------------------------------------------------------------|-------|
| Cr(III)       | APTES as silane coupling agent; Cr(III)-IIP prepared by sol-gel reaction coupled with surface imprinting on the surface of mesoporous SBA-15. | 38.5         | Batch adsorption;<br>Conditions: pH 6.0; 298 K; 120 min.<br>Fitted by Langmuir/PSO;<br>Selective adsorption of Cr(III) in competition with: Co(II), Cr(VI), Sr(II), Zn(II), Cu(II), Pb(II), Ni(II), in binary systems.                               | [137] |
|               | Cr(III)-(phen) <sub>2</sub> /(ST+EGDMA), acetonitrile as porogen                                                                              |              | Dynamic adsorption;<br>Conditions: pH 4.5; 298 K; flow rate 1 mL min <sup>-1</sup><br>Reusability: 100 cycles<br>Selectivity coefficient in competition with Fe(III), Mn(II) and Cu(II): 9.6; 4.4; 16.7, respectively.                               | [139] |
|               | Azo dye functionalized CS cross-linked with glyoxal                                                                                           | 250          | Batch adsorption;<br>Conditions: pH 5.0; 303 K; 1 g L <sup>-1</sup> ; 180 min.<br>Fitted by Langmuir/PSO;<br>Reusability: 96% of original capacity after fifth cycle<br>Selective adsorption of Cr(III) in competition with: Cu(II), Ni(II), Co(II), | [141] |

|        |                                                                                                |        |                                                                                                                                                                                                                                                                                                                                                                                                                                                      |       |
|--------|------------------------------------------------------------------------------------------------|--------|------------------------------------------------------------------------------------------------------------------------------------------------------------------------------------------------------------------------------------------------------------------------------------------------------------------------------------------------------------------------------------------------------------------------------------------------------|-------|
|        |                                                                                                |        | Fe(III), Eu(III), Al(III), in binary systems                                                                                                                                                                                                                                                                                                                                                                                                         |       |
|        | ALG/PVA/ALG-AuNPs membrane                                                                     | 1.75   | Batch adsorption;<br>Conditions: pH 6.0; 313 K; 20 h.<br>Fitted by Langmuir/PFO;<br>Reusability: four sorption/desorption cycles<br>Selectivity: high selectivity towards Cr(III) in presence of Cr(VI): sorption: > 97%/<5%                                                                                                                                                                                                                         | [142] |
| Cr(VI) | 4-VP-DMAEMA-EGDMA                                                                              | 286.56 | Batch adsorption;<br>Conditions: pH 2.0; 298 K; 1 g L <sup>-1</sup> ; 10 min.<br>Fitted by Langmuir/PSO;<br>Reusability: 5% decrease of the sorption capacity at the end of the fifth cycle<br>Selectivity constant in the presence of Cu(II), Cd(II) and Cr(III): 135.78; 145.44; 69.91                                                                                                                                                             | [143] |
|        | Quaternary PP-g-DMAEMA fibers                                                                  | 156.5  | Batch adsorption;<br>Conditions: pH 2.0; 298 K; 3 g L <sup>-1</sup> ; 240 min.<br>Fitted by Freundlich/PSO;<br>Reusability: small decrease of the original sorption capacity after five sorption/desorption cycles<br>Selectivity for Cr <sub>2</sub> O <sub>7</sub> <sup>2-</sup> in competition with HPO <sub>4</sub> <sup>2-</sup> , NO <sub>3</sub> <sup>-</sup> , SO <sub>4</sub> <sup>2-</sup> , with k' of 36.7, 39.9 and 1.46, respectively. | [144] |
|        | Pebax/CS/GO/APTES nanofibers                                                                   | 521.7  | Batch adsorption;<br>Conditions: pH 3.0; 298 K; 0.5 g L <sup>-1</sup> ; 120 min.<br>Fitted by Redlich-Peterson/PSO;<br>Relative selectivity in respect with: Pb(II), Cu(II) and Ni(II) has been 11.53, 13.86 and 16.86, respectively.                                                                                                                                                                                                                | [145] |
|        | PP fibers-g-AA, amidated with TETA cross-linked with GA                                        | 167    | Batch adsorption;<br>Conditions: pH 3.0; 303 K; 60 min.<br>Fitted by Freundlich/PSO;<br>Reusability: adsorption capacity towards Cr(VI) was > 82% after 10 sorption/desorption cycles                                                                                                                                                                                                                                                                | [148] |
|        | Pre-complex (Cr(VI)+4-VP) + (Fe <sub>3</sub> O <sub>4</sub> /SiO <sub>2</sub> ) + (HEMA+EGDMA) | 44.86  | Batch adsorption;<br>Conditions: pH 3.0; 298 K; sorbent dose: 1.7 g L <sup>-1</sup> ; 20 min.<br>Fitted by Langmuir/PSO;                                                                                                                                                                                                                                                                                                                             | [149] |

|  |                                        |        |                                                                                                                                                                                                                                                                                   |       |
|--|----------------------------------------|--------|-----------------------------------------------------------------------------------------------------------------------------------------------------------------------------------------------------------------------------------------------------------------------------------|-------|
|  |                                        |        | Reusability: no loss of the sorption capacity after five cycles<br>Relative selectivity in respect with Ni(II), Cd(II), Cu(II), NO <sub>3</sub> <sup>-</sup> , SO <sub>4</sub> <sup>2-</sup> and PO <sub>4</sub> <sup>3-</sup> : 4.89, 3.29, 4.06, 2.95, 2.2; 2.45, respectively. |       |
|  | 4-VP- <i>co</i> -EGDMA                 | 3.28   | Batch adsorption;<br>Conditions: pH 2.0; 3.2 g L <sup>-1</sup> ; 313 K; 30 min.<br>Fitted by Freundlich/PSO;<br>Reusability: good stability after 10 cycles                                                                                                                       | [151] |
|  | 1-VI- <i>co</i> -MAA- <i>co</i> -EGDMA | 76.92  | Batch adsorption;<br>Conditions: pH 2.0; 10 g L <sup>-1</sup> ; 323 K; 15 min.<br>Fitted by Langmuir/PSO;<br>Reusability: sorption capacity decreased with 1.87% at the end of tenth cycle.                                                                                       | [153] |
|  | CMC/ECH/EDA                            | 177.62 | Batch adsorption;<br>Conditions: pH 2.0; 1 g L <sup>-1</sup> ; 298 K; 120 min.<br>Fitted by Langmuir/PSO;<br>Reusability: almost no decrease of the sorption capacity after the fifth cycle of adsorption/desorption                                                              | [154] |

**Abbreviations:** DMAEMA - 2-(dimethylamino)ethyl methacrylate; CMC - carboxymethylcellulose; EDA - ethylene diamine; phen - 1,10-phenantroline; NPs – nanoparticles; PP - polypropylene; ALG - alginate.

**Table S8.** Sorption of other transition metal ions by IIPs.

| Imprinted TMI | Polymeric material                              | $q_m$ , mg/g | Comments                                                                                                                                                                                                                                                                                                            | Ref.  |
|---------------|-------------------------------------------------|--------------|---------------------------------------------------------------------------------------------------------------------------------------------------------------------------------------------------------------------------------------------------------------------------------------------------------------------|-------|
| Mn(II)        | MAA- <i>co</i> -MBAA<br>On the surface of MWCNT | -            | Batch adsorption<br>Conditions: pH 5.0; RT; 100 min<br>Fitted by Langmuir/PSO<br>Reusability: low decrease of the sorption capacity after five cycles.<br>Selectivity: the adsorption capacity decreased in the order: Mn(II) > Cr(III) > Fe(II) > Co(II); detection limit of Pt/MWCNT-IIP for Mn(II) was 0.0138 mM | [158] |
| Mo(VI)        | Mo (VI)-ICTGBs                                  | ~300         | Batch adsorption<br>Conditions: pH 6.0; 2 g L <sup>-1</sup> ; RT; 500 min<br>Fitted by Freundlich/PSO                                                                                                                                                                                                               | [159] |

|         |                                                                  |        |                                                                                                                                                                                                                                                                                                                                                                                              |       |
|---------|------------------------------------------------------------------|--------|----------------------------------------------------------------------------------------------------------------------------------------------------------------------------------------------------------------------------------------------------------------------------------------------------------------------------------------------------------------------------------------------|-------|
|         |                                                                  |        | Reusability: reused up to 10 times with $300 \text{ mg g}^{-1} > Q > 250 \text{ mg g}^{-1}$<br>Selectivity for Mo(VI) in the presence of Cr(VI), As(V), V(VI)                                                                                                                                                                                                                                |       |
|         | MAA-co-EGDMA<br>Fe <sub>3</sub> O <sub>4</sub> /SiO <sub>2</sub> | 31.08  | Batch adsorption<br>Conditions: $1 \text{ g L}^{-1}$ ; $3 \text{ M HCl}$ ; $298 \text{ K}$ ; $120 \text{ min}$<br>Fitted by Langmuir/PSO<br>Reusability: can be reused at least 5 times without significant loss of adsorption capacity.<br>Selectivity: $k'$ for Mo(VI) in the presence of Ni(II), Cd(II), Mn(II), Zn(II) and Cu(II) were 10.08, 7.11, 5.12, 11.31, and 7.88, respectively. | [160] |
|         | ALG-cl-GA<br>With PVA as thickener                               | 114.4  | Batch adsorption<br>Conditions: $2 \text{ g L}^{-1}$ ; pH 3; $303 \text{ K}$ ; $72 \text{ h}$<br>Fitted by Langmuir/PSO<br>Reusability: reused up to three cycles.<br>Selectivity at pH 3: $k' = 2.43\text{--}3.71$ , for Re(VII), Cu(II), Fe(III), Zn(II) and Mn(II), and 47.16 for Mo(VI).                                                                                                 | [161] |
| Re(VII) | I-EDA-CS                                                         | 418.98 | Batch adsorption<br>Conditions: $1 \text{ g L}^{-1}$ ; pH 3; $303 \text{ K}$<br>Fitted by Langmuir/PSO<br>Reusability: almost no loss of the sorption capacity after six cycles<br>Selectivity for Re(VII) in the presence of Cu(II), Zn(II), Fe(III), and Mn(II), at pH 3.0: 1.4, 1.51, 3.46, and 1.83.                                                                                     | [162] |
|         | I-CTS-KIT-6                                                      | 368.8  | Batch adsorption<br>Conditions: $1 \text{ g L}^{-1}$ ; pH 3.0; $303 \text{ K}$<br>Fitted by Langmuir/PSO<br>Reusability: the sorbent preserved its capacity after six sorption-desorption cycles.<br>Selectivity: the adsorption efficiency for Zn(II), Cu(II), Mn(II) and Fe(III) in the presence of Re(VII) was $< 5\%$ .                                                                  | [163] |
| Ru(III) | Ru(III)-BnTSn complex<br>4-VP-co-ST-co-DVB                       | 0.237  | Column adsorption<br>Conditions: pH 8.0; flow rate $0.2 \text{ mL min}^{-1}$ ;<br>Selectivity in the presence of Pt(IV), Pd(II), Rh(II), Co(II) as competitors: $k$ values in the range 5.4–12.5                                                                                                                                                                                             | [165] |

|  |                                                                                 |       |                                                                                                                                                                                                                                                                                                                                                                          |       |
|--|---------------------------------------------------------------------------------|-------|--------------------------------------------------------------------------------------------------------------------------------------------------------------------------------------------------------------------------------------------------------------------------------------------------------------------------------------------------------------------------|-------|
|  | P(MMA-HEMA)<br>blended with<br>PVDF                                             | 42.31 | Batch adsorption<br>Conditions: 1 g L <sup>-1</sup> ; pH 2.0; 298 K; 2 h<br>Fitted by Langmuir/PSO<br>Reusability: sorption capacity was 40.25 mg g <sup>-1</sup> after 8 cycles<br>Selectivity: k' was 4.14 in the presence of Ni(II) as interfering ion                                                                                                                | [167] |
|  | Ru-PTCS                                                                         | 249   | Batch adsorption<br>Conditions: 1 g L <sup>-1</sup> ; pH 4; 303 K; 180 min<br>Fitted by Langmuir/PSO<br>Reusability: 96% of sorption capacity after 8 sorption-desorption cycles<br>Selectivity: in multicomponent systems with Pd(II), Pt(IV), Co(II), Fe(III), Ni(II), Cu(II), Mn(II), Zn(II), Ca(II) as competitors: k values in the range 5.47-12.37; k' values > 6. | [168] |
|  | Ru-IIP<br>PDEA- <i>b</i> -P(DEA- <i>co</i> -AM)<br>in<br>P(AM- <i>co</i> -MBAA) | 15.46 | Batch adsorption<br>Conditions: 5 g L <sup>-1</sup> ; pH 1.5; 308 K; 300 min<br>Fitted by Langmuir/PFO<br>Reusability: sorption capacity slightly decreased in the first 8 cycles, and significantly in the later three cycles.<br>Selectivity: k' values of Ru(III)/Ni(II), Ru(III)/Fe(III) and Ru(III)/Cu(II) systems were 3.102, 2.738 and 3.032.                     | [169] |

**Abbreviations:** AAm - acrylamide; BnTSn - benzaldehyde thiosemicarbazone; cl - cross-linked; DEA - N,N-diethylacrylamide; DVB - divinylbenzene; EDA - ethylene diamine; ICTGBs - ion imprinted chitosan gel beads; MBAAm - N,N'-methylene-bis-acrylamide; MWCNTs - multiwalled carbon nanotube; PVA - poly(vinyl alcohol); PVDF - polyvinylidene fluoride; Ru-PTCS - 2-pyridylthiourea-chitosan imprinted with Ru(III); TEA - triethanol amine.

**Table S9.** Selective sorption of Ag(I), Au(III) and Pd(II) ions by IIP materials.

| Imprinted HMI | Polymeric material    | $q_m$ , mg/g | Comments                                                                                                                                                                                                             | Ref.  |
|---------------|-----------------------|--------------|----------------------------------------------------------------------------------------------------------------------------------------------------------------------------------------------------------------------|-------|
| Ag(I)         | CS hydrogels          | ≈ 120        | Batch adsorption;<br>Conditions: pH 5.6; 298 K; 4h;<br>Selectivity coefficient (k): Cu(II) = 4.21                                                                                                                    | [170] |
|               | CS/TEA hydrogel beads | 510          | Batch adsorption;<br>Conditions: pH 5, 298 K, 1h for the CS/TEA hydrogel and 10h for the CS/TEA gel beads;<br>Selectivity coefficients (k):<br>CS/TEA hydrogel beads: Cu(II) = 3.72; Pb(II) = 28.56; Zn(II) = 30.64; | [173] |
|               | CS/TEA gel beads      | 350          |                                                                                                                                                                                                                      |       |

|         |                                                                                                            |        |                                                                                                                                                                                                                                                                                               |       |
|---------|------------------------------------------------------------------------------------------------------------|--------|-----------------------------------------------------------------------------------------------------------------------------------------------------------------------------------------------------------------------------------------------------------------------------------------------|-------|
|         |                                                                                                            |        | CS/TEA gel beads: Cu(II) = 3.95; Pb(II) = 39.4; Zn(II) = 37.9;<br>Reusability: 20 cycles                                                                                                                                                                                                      |       |
|         | CS gel beads                                                                                               | 89.2   | Batch adsorption;<br>Conditions: pH 5, 298K, 48h;<br>Fitting: Langmuir/IPD;<br>Selective for Ag(I) over Cu(II);<br>Sorption of Ag(I) proceeds by ion exchange from pH 1 to pH 3, and by complexation from pH 3 to pH 5.                                                                       | [171] |
|         | CS-P(DVB-GMA-ST) particles                                                                                 | 166    | Batch adsorption;<br>Conditions: pH 5, 318 K, 8h;<br>Fitting: Langmuir/PSO;<br>Relative selectivity coefficients (k'): Cu(II) = 3.67-4.72, Zn(II) = 4.07-6.22                                                                                                                                 | [172] |
| Au(III) | Ethylenediamine N-(2-(1-imidazolyl)ethyl)-modified CS resin                                                | 810.67 | Batch adsorption;<br>Conditions: pH 3;<br>Fitting: Langmuir/PSO;<br>Relative selectivity coefficients (k'): Cu(II) = 4.263; Ni(II) = 3.405<br>Regenerated with 0.7 M TU – 2 M HCl solution;<br>Reusability: 5 cycles (95%).                                                                   | [174] |
|         | Poly(ethylene glycol) diacrylate cross-linked (4-Acryloylmorpholine)-co-(2-hydroxyethyl acrylate) hydrogel | 78.43  | Batch adsorption;<br>Conditions: pH 1, 3h;<br>Relative selectivity factors ( $\alpha$ ): Fe(III) = 50378, Hg(II) = 72588, Zn(II) = 40381.<br>Reusability: 5 cycles;<br>Regenerated with 0.8 M TU – 2 M HCl solution                                                                           | [175] |
|         | TU-functionalized ALG beads                                                                                | 184.82 | Batch adsorption;<br>Conditions: pH < 2.36, 323 K, 6h;<br>Fitting: Freundlich/PFO, PSO;<br>Selective for Au(III) in mixture with Cu(II), Co(II), Ni(II) and Pb(II);<br>Reusability: 5 cycles;<br>UV light induced the photo-reduction of Au(III) ions to Au NPs.                              | [176] |
|         | 2-mercaptobenzaldehyde-CS sorbent                                                                          |        | Batch adsorption;<br>Conditions: pH 4, 303 K, 1h;<br>Fitting: Langmuir;<br>Relative selectivity coefficients (k'): Cu(II) = 4.51, Ni(II) = 3.57, Cr(III) = 4.47, Pd(II) 5.13;<br>Regeneration with 0.5 M TU + 1 M H <sub>2</sub> SO <sub>4</sub> ;<br>Reusability: 7 cycles ( $\approx$ 95%). | [177] |
| Pd(II)  | CS fibers                                                                                                  | 150.3  | Batch adsorption; Mixtures;<br>Conditions: pH 1, 298 K;                                                                                                                                                                                                                                       | [178] |

|  |                              |       |                                                                                                                                                                                                                                                     |       |
|--|------------------------------|-------|-----------------------------------------------------------------------------------------------------------------------------------------------------------------------------------------------------------------------------------------------------|-------|
|  |                              |       | Selective for Pd(II) in mixture with Co(II), Ni(II) and Pt(IV);<br>Reusability: 5 cycles                                                                                                                                                            |       |
|  | CS fibers                    | 326.4 | Batch adsorption;<br>Conditions: pH 1, 298 K, 1h, 0.4 g/L sorbent dose;<br>Fitting: Freundlich/PSO;<br>Selectivity coefficients (k): Pt(IV) = 2082 at pH 1, 29.12 at pH 2, and 5.48 at pH 3;<br>Reusability: 3 cycles (95.6%)                       | [179] |
|  | CS fibers                    | 112.4 | Batch/Column adsorption; Mixture;<br>Conditions: pH 1, 298 K;<br>Selective for Pd(II) in mixture with Co(II), Ni(II), Cu(II) and Pt(IV);<br>Selective recovery of Pd(II) in packed columns from extremely acid (pH 0.2) hydrometallurgy wastewater. | [180] |
|  | 2-Aminobenzaldehyde-CS resin | 275   | Batch adsorption;<br>Conditions: pH 5, 303K, 1h, 1 g/L sorbent dose;<br>Fitting: Langmuir/PSO;<br>Relative selectivity coefficients (k'): Cu(II) = 1.97, Ni(II) = 1.88, Co(II) = 2.05, Mn(II) = 2.47;<br>Reusability: 5 cycles (96% recovery).      | [181] |

Abbreviations: TU – thiourea; P(DVB–GMA–St) – poly(divinylbenzene–glycidyl methacrylate–styrene); ECH – epichlorohydrin.

**Table S10.** Sorption of Ga(III), In(III) and Pb(II) ions by IIP materials.

| Imprinted HMI | Polymeric material          | $q_m$ , mg/g | Comments                                                                                                                                                                                                                                                                                                                                                                   | Ref.  |
|---------------|-----------------------------|--------------|----------------------------------------------------------------------------------------------------------------------------------------------------------------------------------------------------------------------------------------------------------------------------------------------------------------------------------------------------------------------------|-------|
| Ga(III)       | AA-g-CS bio-adsorbent       | 192.4        | Batch adsorption;<br>Conditions: pH 3, 323 K;<br>Fitting: Langmuir/PSO;<br>Selective for Ga(III) in binary mixtures with Si(IV), Ge(III), Zn(II) or Al(III);<br>Reusability: 6 cycles (90.25%)                                                                                                                                                                             | [204] |
| In(III)       | PVPA-g-silica gel composite | 45.07        | Batch and column adsorption;<br>Conditions: pH 3, 298 K, 10 min;<br>Fitting: Langmuir/PSO;<br>Selectivity coefficients: In(III)/Cu(II) = 189.17, In(III)/Pb(II) = 67.94, In(III)/Zn(II) = 886.63, In(III)/Fe(II) = 2479.71.<br>Reusability: 6 cycles (in column);<br>Column adsorption capacity: 34.57 mg/g (flow rate = 0.5 mL/min);<br>Tested on real mining wastewater. | [205] |

|        |                                               |        |                                                                                                                                                                                                                                                                                                                                                                                                             |       |
|--------|-----------------------------------------------|--------|-------------------------------------------------------------------------------------------------------------------------------------------------------------------------------------------------------------------------------------------------------------------------------------------------------------------------------------------------------------------------------------------------------------|-------|
|        | P(VPA-AMT)-g-silica gel composite             | 60.62  | Batch and column adsorption;<br>Conditions: pH 3, 318 K, 16 min;<br>Fitting: Langmuir/PSO;<br>Selectivity coefficients: In(III)/Cu(II) = 41, In(III)/Pb(II) = 212, In(III)/Zn(II) = 37, In(III)/Fe(II) = 69;<br>Column adsorption capacity: 48.75 mg/g (flow rate = 0.5 mL/min);<br>Reusability: 6 cycles (in column);<br>Tested on real mining wastewater.                                                 | [206] |
| Pb(II) | Dithiocarbamate-CS beads                      | 359.68 | Batch adsorption;<br>Conditions: pH 6, 303 K, 3h;<br>Fitting: Langmuir/PSO;<br>Relative selectivity coefficients: Pb(II)/Cd(II) = 5.08, Pb(II)/Cu(II) = 2.45, Pb(II)/Ca(II) = 3.25, Pb(II)/Mg(II) = 4.24, Pb(II)/Zn(II) = 3.20;<br>Reusability: 10 cycles (75% recovery)                                                                                                                                    | [210] |
|        | TEPA-CS beads                                 | 259.68 | Batch adsorption;<br>Conditions: pH6, 313K, 8h;<br>Fitting: Langmuir/PSO;<br>Relative selectivity coefficients: Pb(II)/Cd(II) 2.17, Pb(II)/Cu(II) = 5.08, Pb(II)/Ca(II) 2.18, Pb(II)/Mg(II) = 2.29, and Pb(II)/Zn(II) = 15.41;<br>Reusability: 10 cycles (84% recovery)                                                                                                                                     | [211] |
|        | P(MAA-EGDMA)-g-CS IPN hydrogel                | 37.5   | Batch/column adsorption;<br>Conditions: pH 6, 2h;<br>Fitting: Langmuir/PSO;<br>Selectivity coefficients: Pb(II)/W(VI) = 161.58, Pb(II)/Zn(II) = 31.00, Pb(II)/Cu(II) = 39.12; Pb(II)/Mn(II) = 52.75; Pb(II)/K(I) = 77.58; Pb(II)/Mg(II) = 44.98;<br>Tested in column for selective extraction of Pb(II) from PCB recycling unit wastewater;<br>Reusability: 5 cycles (using PCB recycling unit wastewater). | [207] |
|        | Fe <sub>3</sub> O <sub>4</sub> -CS biosorbent | 69.48  | Batch adsorption;<br>Conditions: pH 5, 8h;<br>Relative selectivity coefficients: Pb(II)/Cu(II) = 2.32, Pb(II)/Cd(II) = 2.2, Pb(II)/Ni(II) = 2.05;<br>Reusability: 5 cycles (87% recovery)                                                                                                                                                                                                                   | [213] |

Abbreviations: PVPA – poly(vinylphosphonic acid); AMT – allyl mercaptan; TEPA – tetraethylenepentamine; PAA – poly(acrylic acid); PCB – printed circuit boards; IPN – interpenetrated polymer networks.
